# Supplementary material
Source: PubMed Central journal article supplement (PMC5408315)
Supplement: NIHMS829179-supplement.pdf [file NIHMS829179-supplement.pdf]

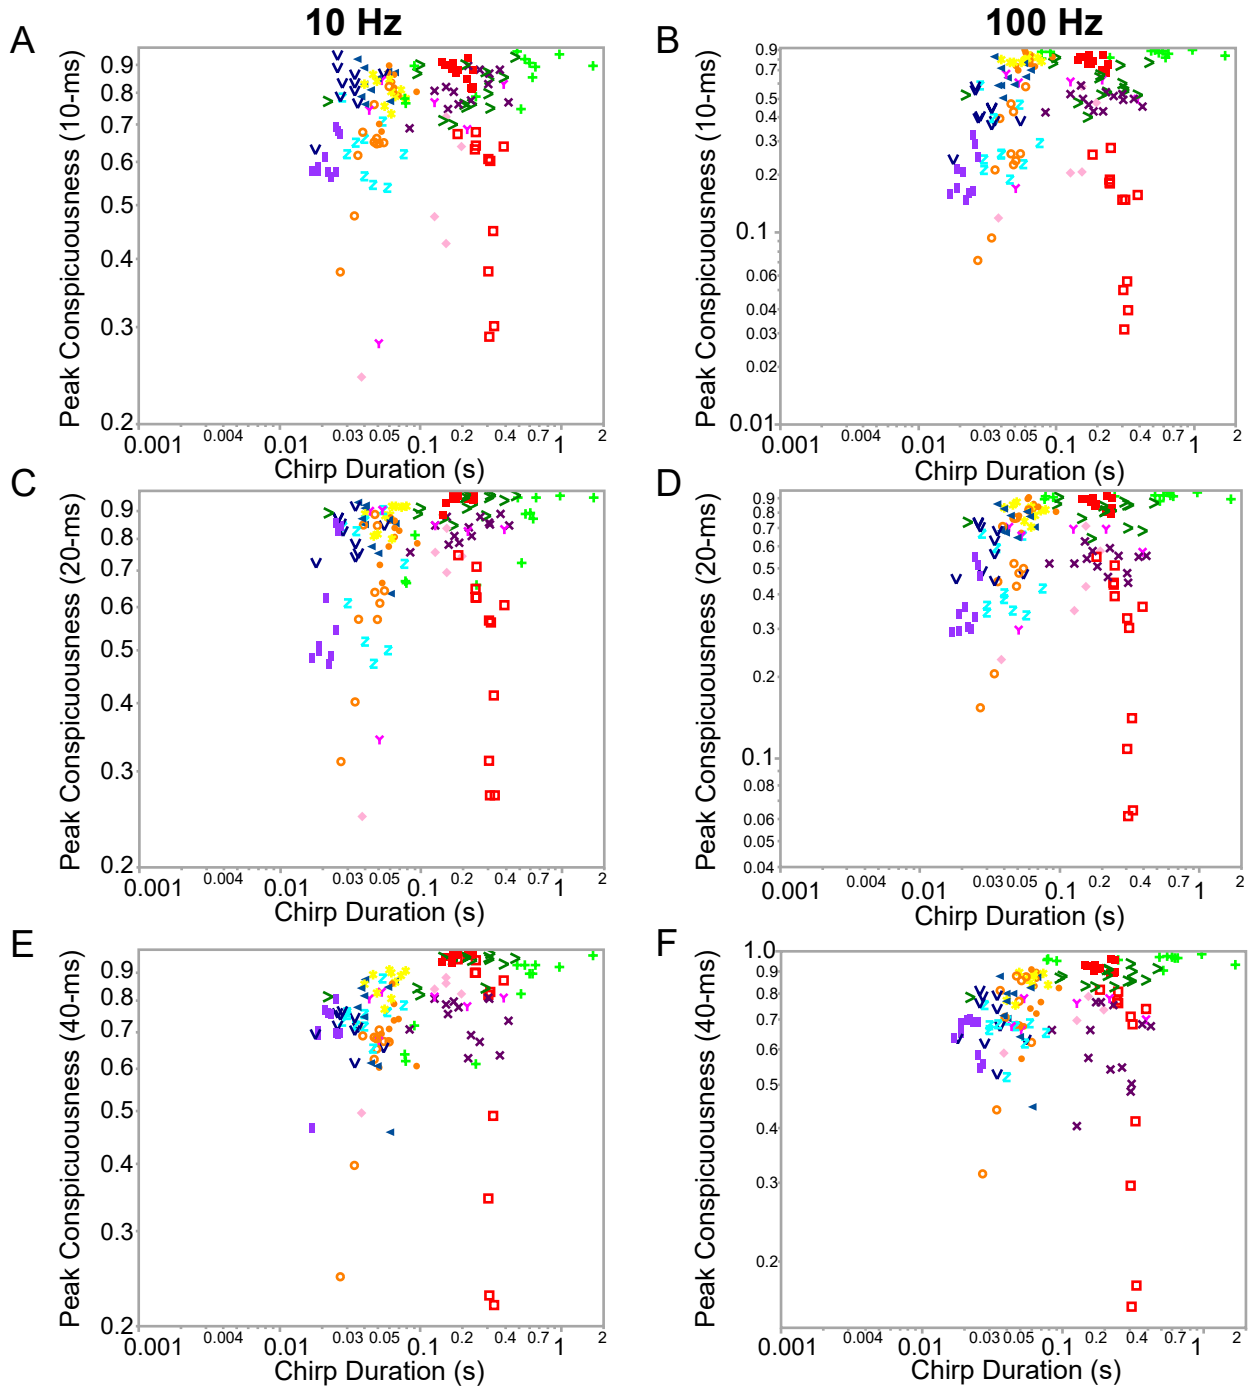

### Species

|                                |                                  |                       |                        |                          |                          |
|--------------------------------|----------------------------------|-----------------------|------------------------|--------------------------|--------------------------|
| ● <i>A. leporhynchus</i> (big) | ● <i>A. leporhynchus</i> (small) | ● <i>P. gimbali</i>   | ● <i>P. hasemani</i>   | ● <i>A. bonapartii</i>   | ● <i>S. terminalis</i>   |
| ■ <i>A. albifrons</i> (big)    | ■ <i>A. albifrons</i> (small)    | ■ <i>S. nattereri</i> | ■ <i>A. devenanzii</i> | ■ <i>A. balaenops</i>    | ■ <i>S. curvirostris</i> |
| □ <i>A. albifrons</i> (small)  | □ <i>S. porcinum</i>             | □ <i>S. roseni</i>    | □ <i>S. terminalis</i> | □ <i>S. curvirostris</i> | □ <i>S. roseni</i>       |

**Supplemental Fig 1.** Contribution of chirp duration to peak conspicuousness of natural chirps analyzed using a 10-ms window (A,B), a 20-ms window (C,D), and a 40-ms window (E,F) on 10 Hz beats (A,C,E) and 100 Hz beats (B,D,F). Chirp duration (log-transformed) was not strongly associated with peak conspicuousness when analyzed using either a 10-ms or 20-ms windows (partial correlations < 0.1,  $p > 0.30$ ). Chirp duration was included in the stepwise regression model of peak conspicuousness using the 40-ms window, but the association was not statistically significant (partial correlation: 0.09,  $p = 0.11$ ). In general, longer duration chirps tended to be more conspicuous with the 40-ms window. The notable exception was the *A. albifrons* small chirps, which have moderately long durations but are relatively inconspicuous, perhaps because they have little FM.

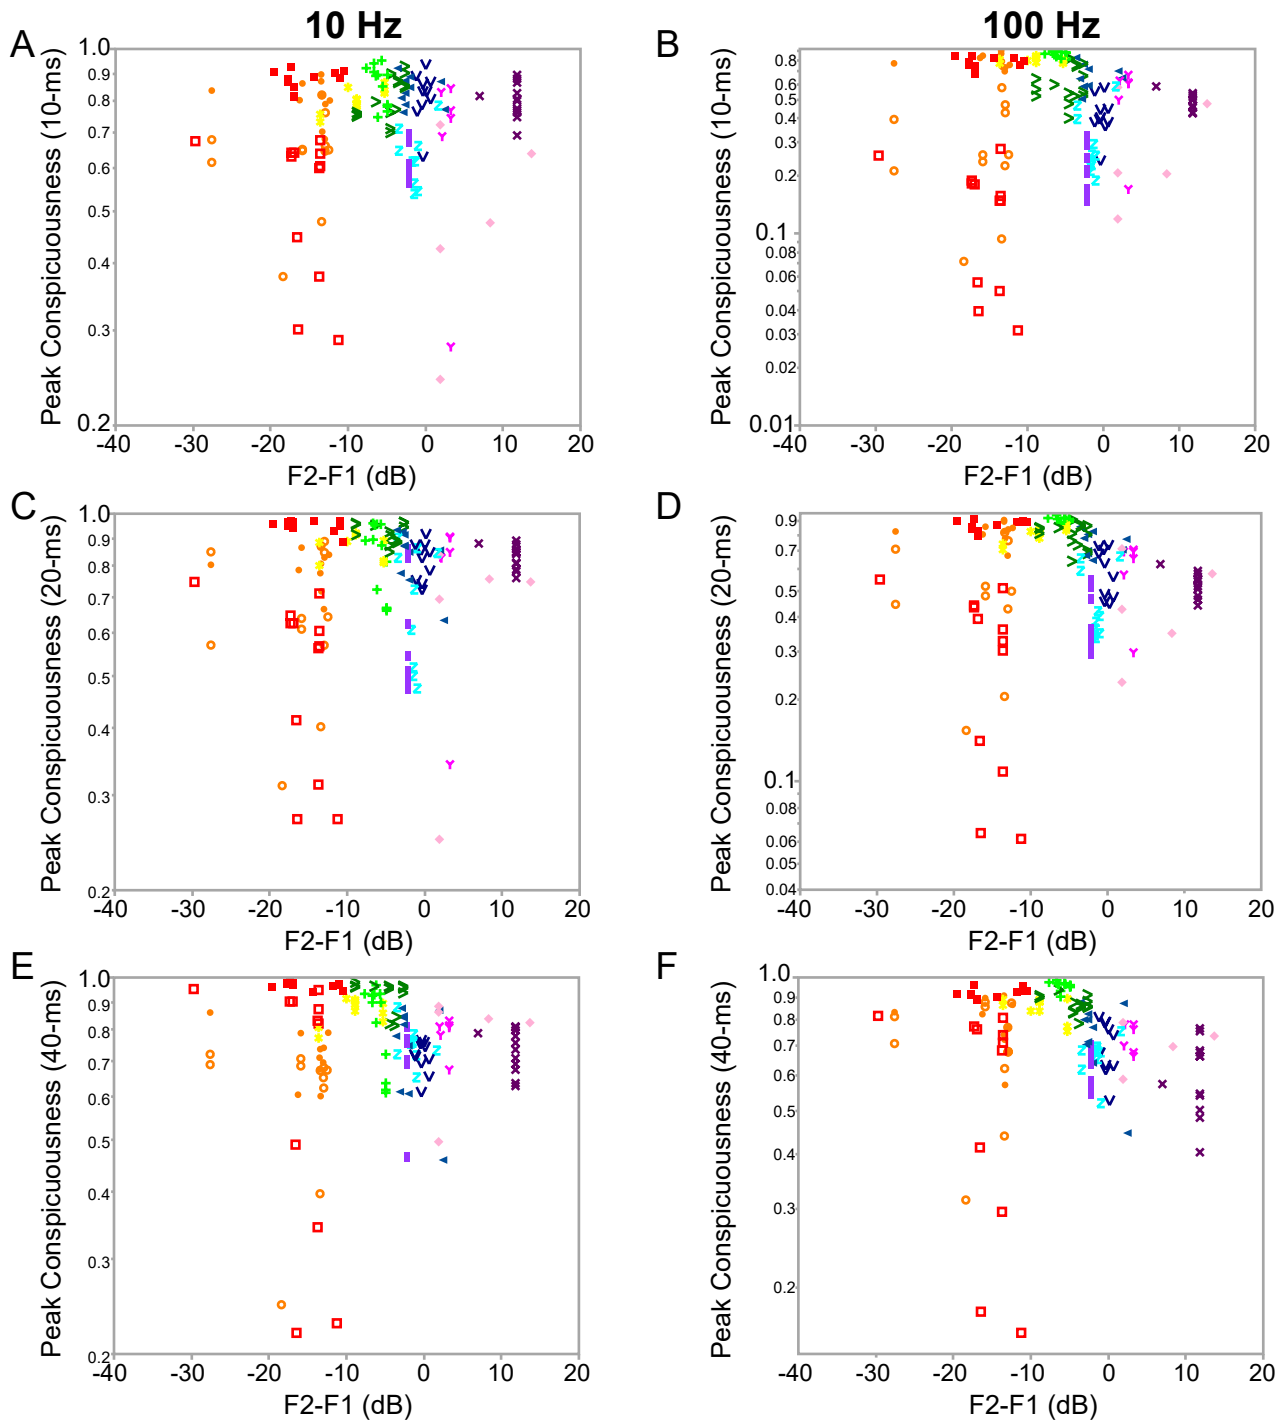

### Species

- |                                 |                        |                        |                          |
|---------------------------------|------------------------|------------------------|--------------------------|
| ● <i>A. leptorhynchus</i> (big) | + <i>P. hasemani</i>   | ◄ <i>A. bonapartii</i> | × <i>S. terminalis</i>   |
| ■ <i>A. albifrons</i> (big)     | > <i>A. devenanzii</i> | ∇ <i>A. balaenops</i>  | ∩ <i>S. curvirostris</i> |
| ◻ <i>A. albifrons</i> (small)   | * <i>P. gimbeli</i>    | ∩ <i>S. nattereri</i>  | ◊ <i>S. roseni</i>       |
|                                 |                        | ■ <i>S. porcinum</i>   |                          |

**Supplemental Fig 2.** Contribution of the waveform complexity variable F2-F1 to peak chirp conspicuousness of natural chirps on 10 Hz beats (A,C,E) and 100 Hz beats (B,D,F) analyzed with the 10-ms (A,B), 20-ms (C,D), and 40-ms (E,F) windows. Unlike for sum chirp conspicuousness (Fig. 10), F2-F1 was not correlated with peak conspicuousness at any window size (10-ms partial correlation: 0.006,  $p=0.92$ ; 20-ms partial correlation: -0.002,  $p=0.97$ ; 40-ms partial correlation: -0.04,  $p=0.54$ ).

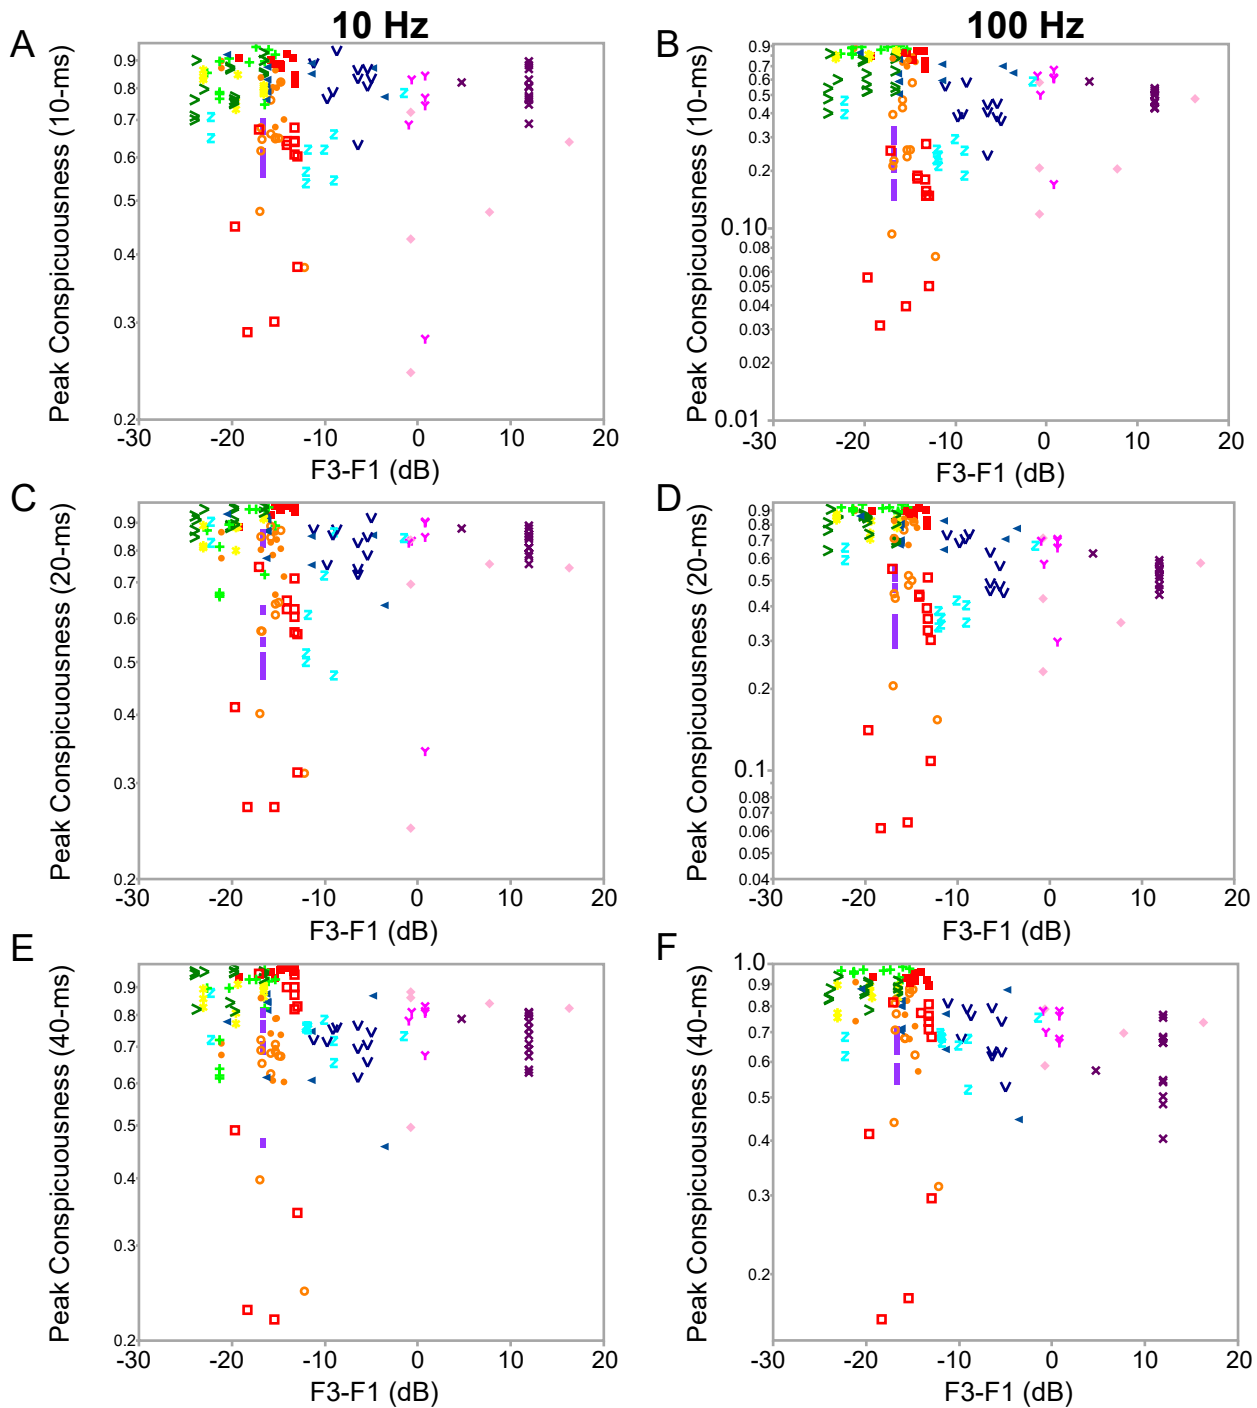

### Species

- *A. leptorhynchus* (big)
- + *P. hasemani*
- ◀ *A. bonapartii*
- × *S. terminalis*
- *A. albifrons* (big)
- *A. leptorhynchus* (small)
- > *A. devenanzii*
- ▼ *A. balaenops*
- Y *S. curvirostris*
- *A. albifrons* (small)
- ★ *P. gimbeli*
- Z *S. nattereri*
- *S. porcinum*
- ◇ *S. roseni*

**Supplemental Fig 3.** Contribution of the waveform complexity variable F3-F1 to peak chirp conspicuousness of natural chirps on 10 Hz beats (A,C,E) and 100 Hz beats (B,D,F) analyzed with the 10-ms (A,B), 20-ms (C,D), and 40-ms (E,F) windows. The waveform variable F3-F1 was not correlated with peak conspicuousness for the 10-ms and 20-ms window sizes (10-ms partial correlation: 0.08,  $p=0.17$ ; 20-ms partial correlation: 0.005,  $p=0.94$ ). However, F3-F1 was negatively correlated with peak conspicuousness at the largest window size (40-ms partial correlation: -0.16,  $p=0.006$ ).

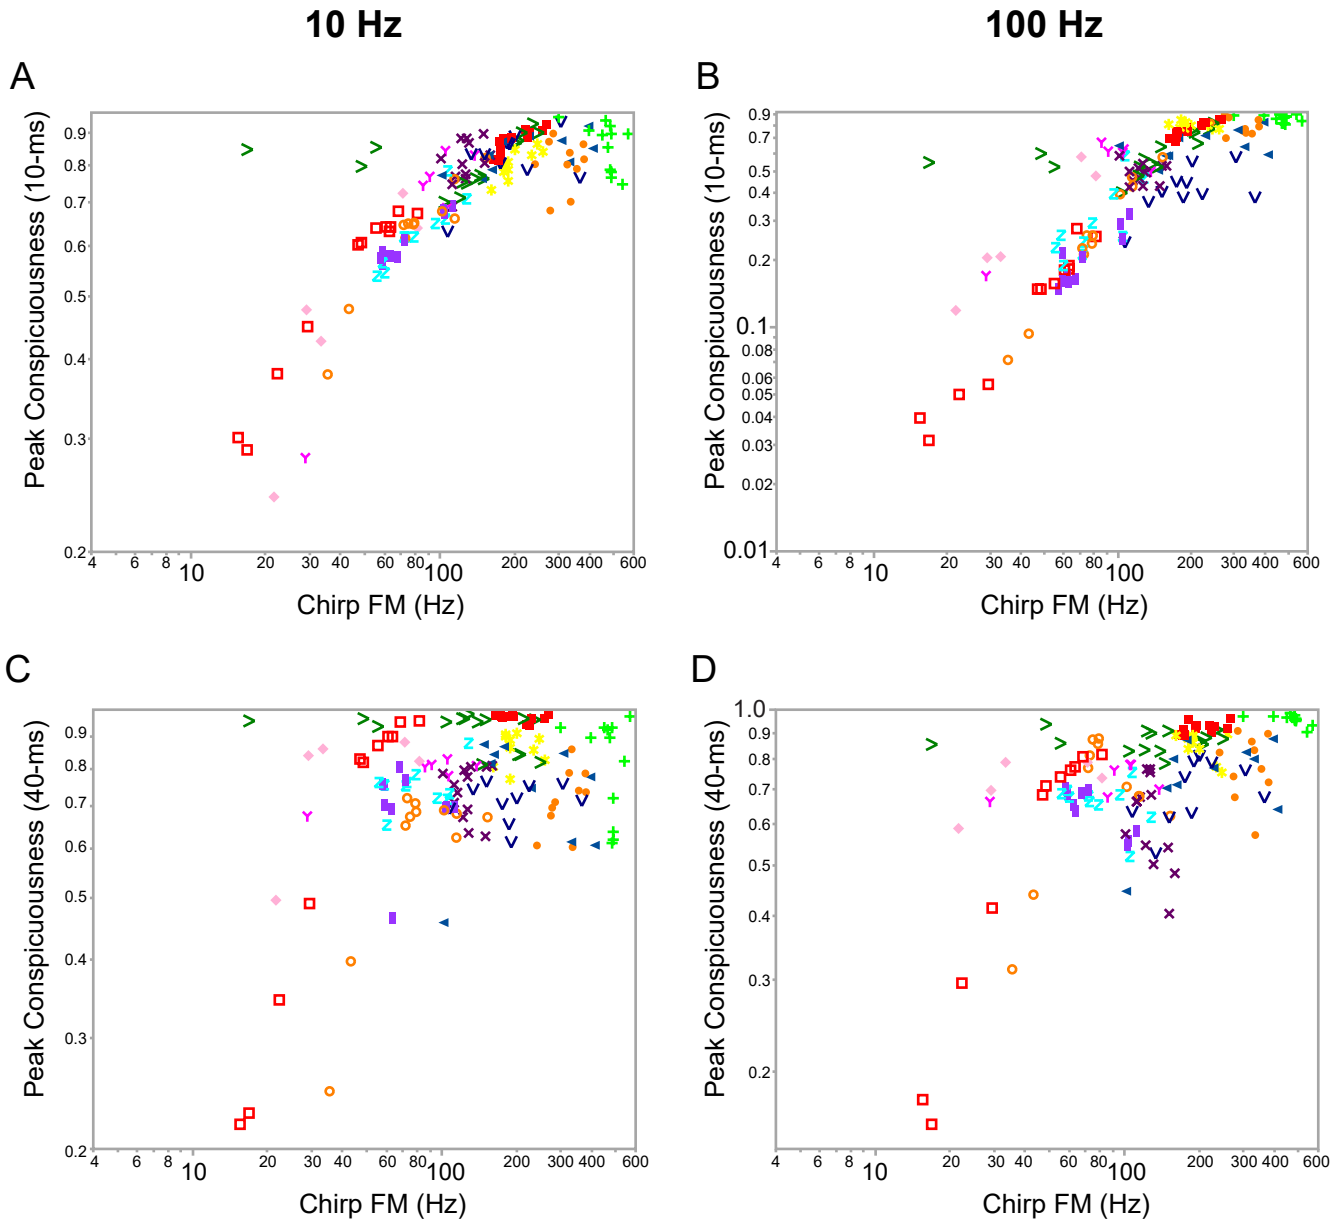

### Species

- |                                 |                                   |                        |                        |
|---------------------------------|-----------------------------------|------------------------|------------------------|
| ● <i>A. leptorhynchus</i> (big) | + <i>P. hasemani</i>              | ◀ <i>A. bonapartii</i> | × <i>S. terminalis</i> |
| ■ <i>A. albifrons</i> (big)     | ○ <i>A. leptorhynchus</i> (small) | > <i>A. devenanzii</i> | ∇ <i>A. balaenops</i>  |
| ◻ <i>A. albifrons</i> (small)   | * <i>P. gimbeli</i>               | z <i>S. nattereri</i>  | ■ <i>S. porcinum</i>   |
|                                 |                                   |                        | ◇ <i>S. roseni</i>     |

**Supplemental Fig 4.** Contribution of chirp FM to peak conspicuousness of natural chirps analyzed with a 10-ms window (A,B) and a 40-ms window (C,D) on 10 Hz beats (A,C) and 100 Hz beats (B,D). Chirp FM (log-transformed) was strongly associated with peak conspicuousness when using a 10-ms analysis window. Chirps with large frequency excursions were more conspicuous (partial correlation: 0.74,  $p < 0.0001$ ). A similar but somewhat less robust pattern emerges for the relationship between chirp FM and peak conspicuousness when using the 40-ms analysis window (partial correlation: 0.44,  $p < 0.0001$ ).

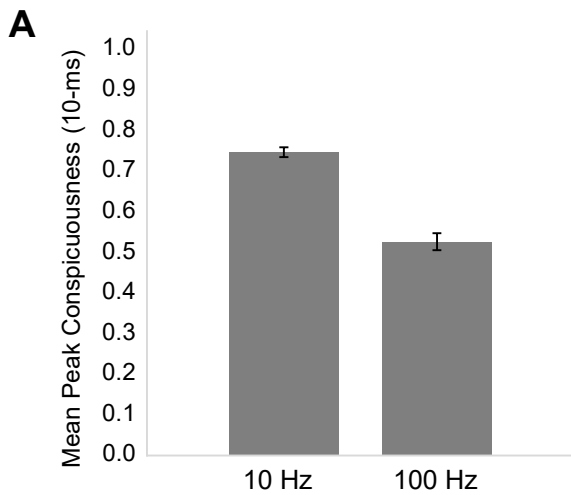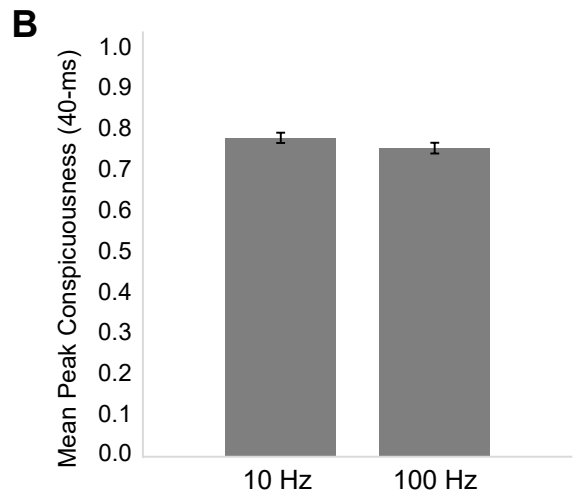

**Supplemental Fig 5.** Effect of DF on peak conspicuousness analyzed using a 10-ms window (A) or a 40-ms window (B). DF significantly affected peak conspicuousness when using the 10-ms window (partial correlation:  $-0.60$ ,  $p < 0.001$ ; 147 chirps). DF was included as a predictor in the 40-ms analysis but was not significant (partial correlation:  $-0.08$ ,  $p = 0.15$ ; 147 chirps). Chirps tended to be more conspicuous on 10 Hz beats compared to 100 Hz beats. Error bars show one standard error from the mean.

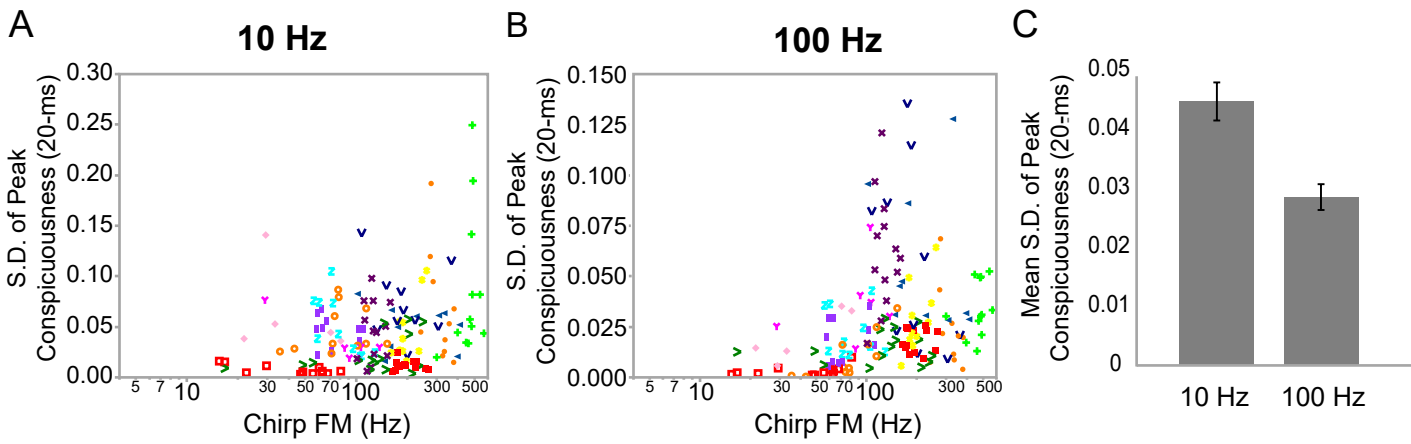

### Species

|                                 |                                   |                        |                        |
|---------------------------------|-----------------------------------|------------------------|------------------------|
| ● <i>A. leptorhynchus</i> (big) | + <i>P. hasemani</i>              | ◀ <i>A. bonapartii</i> | × <i>S. terminalis</i> |
| ■ <i>A. albifrons</i> (big)     | ○ <i>A. leptorhynchus</i> (small) | > <i>A. devenanzii</i> | ∨ <i>A. balaenops</i>  |
| □ <i>A. albifrons</i> (small)   | * <i>P. gimbeli</i>               | ∟ <i>S. nattereri</i>  | ■ <i>S. porcinum</i>   |
|                                 |                                   |                        | ◇ <i>S. roseni</i>     |

**Supplemental Fig 6.** Contribution of chirp FM (A,B) to variation across phase. We calculated the standard deviation (S.D.) of the peak value (20-ms window) across four different phases of the beat in order to determine which chirp or EOD parameters have the greatest impact on variation in conspicuousness. Chirp FM (log-transformed) was the strongest predictor of peak conspicuousness S.D. (partial correlation: 0.39,  $p < 0.001$ ). Higher chirp FM led to more variation in chirp conspicuousness across phase. C) DF also influenced variability in chirp conspicuousness (partial correlation: -0.43,  $p < 0.001$ ; 147 chirps). Chirp conspicuousness varied more across phase on 10 Hz beats compared to 100 Hz beats. Error bars show one standard error from the mean.

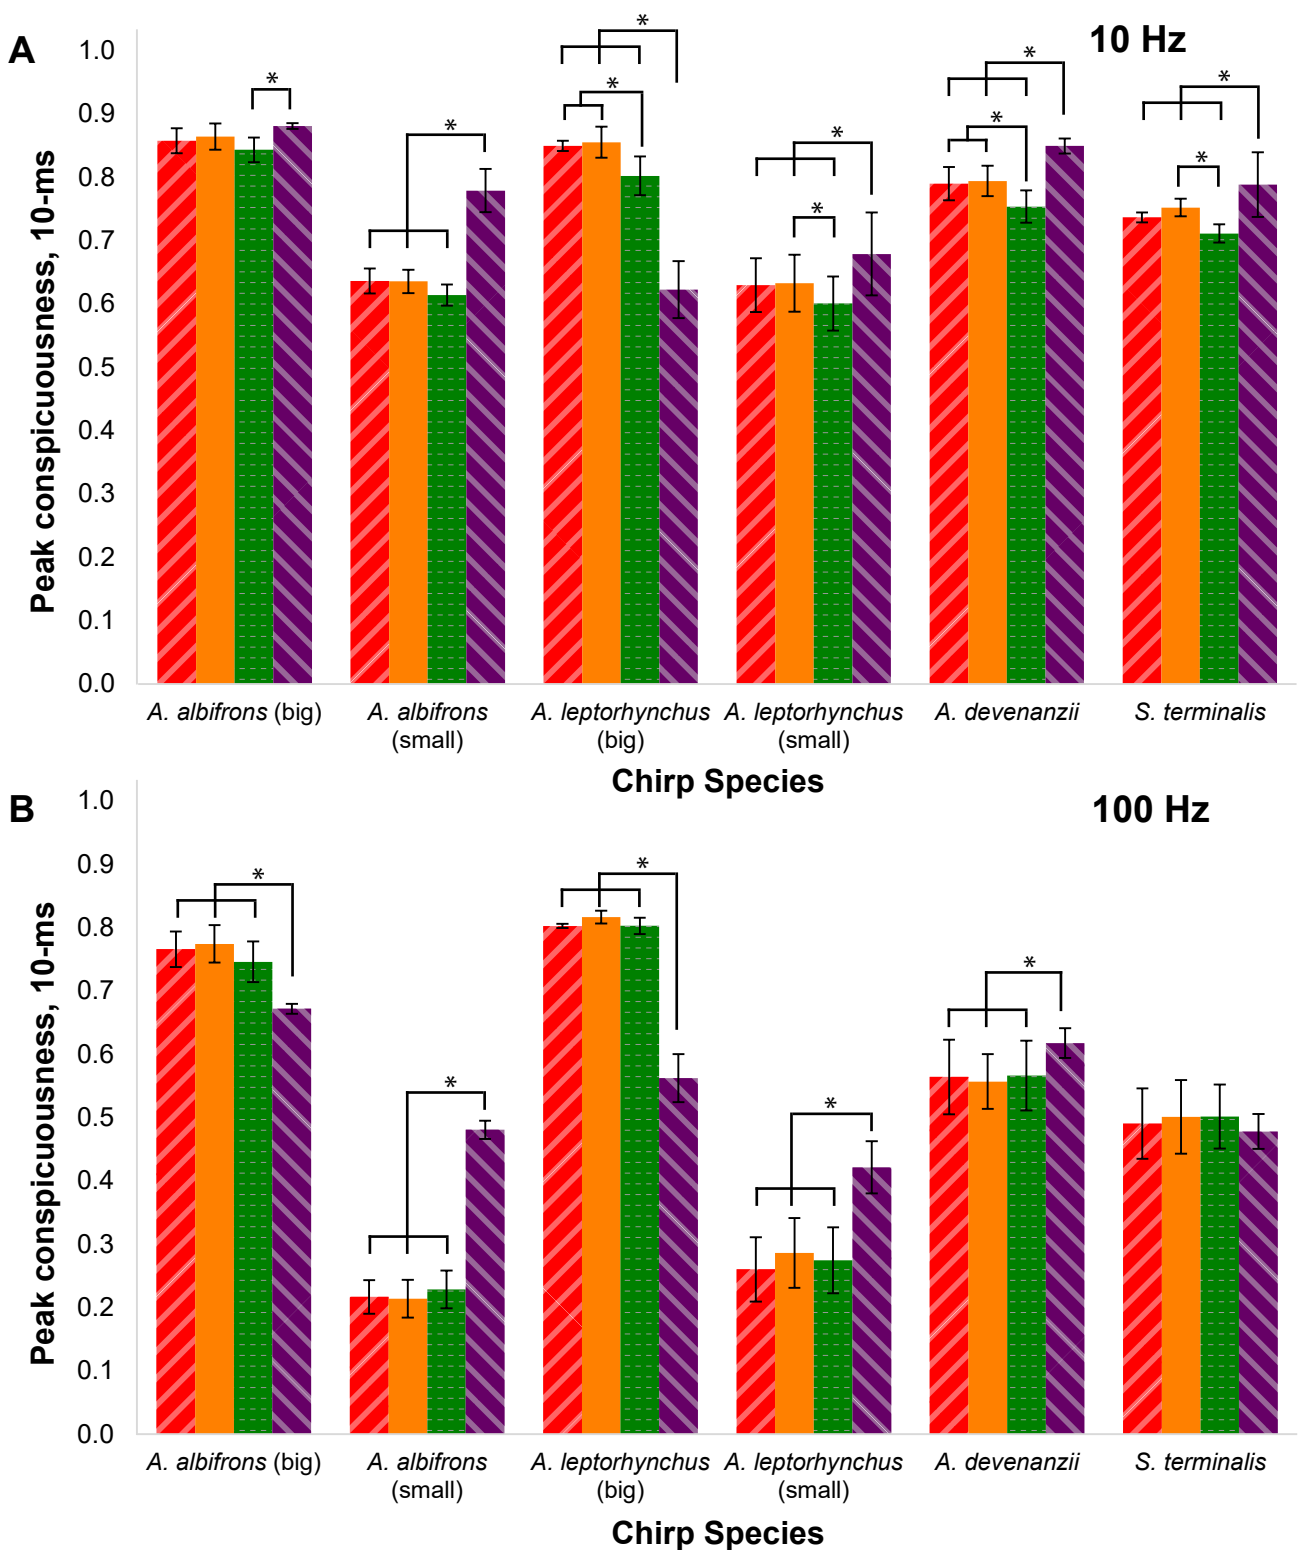

**Supplemental Fig 7.** Peak conspicuousness of hybrid chirps on a A) 10 Hz beat and B) 100 Hz beat (10-ms window). Chirps from four species (including two different types of *A. leptorhynchus* and *A. albifrons* chirps,  $n=6$  from each species/chirp type) were re-synthesized on the waveform of those four species, including the waveform of the species from which the chirp came. The bars are arranged from most sinusoidal (*A. albifrons*) to most complex (*S. terminalis*) EOD waveform. The chirps were combined with an EOD from the waveform donor species to measure peak conspicuousness. Asterisks indicate statistically significant differences ( $p < 0.05$ , Fisher PLSD) between the conspicuousness of chirps on different species-specific EOD waveforms. Error bars show one standard error from the mean.

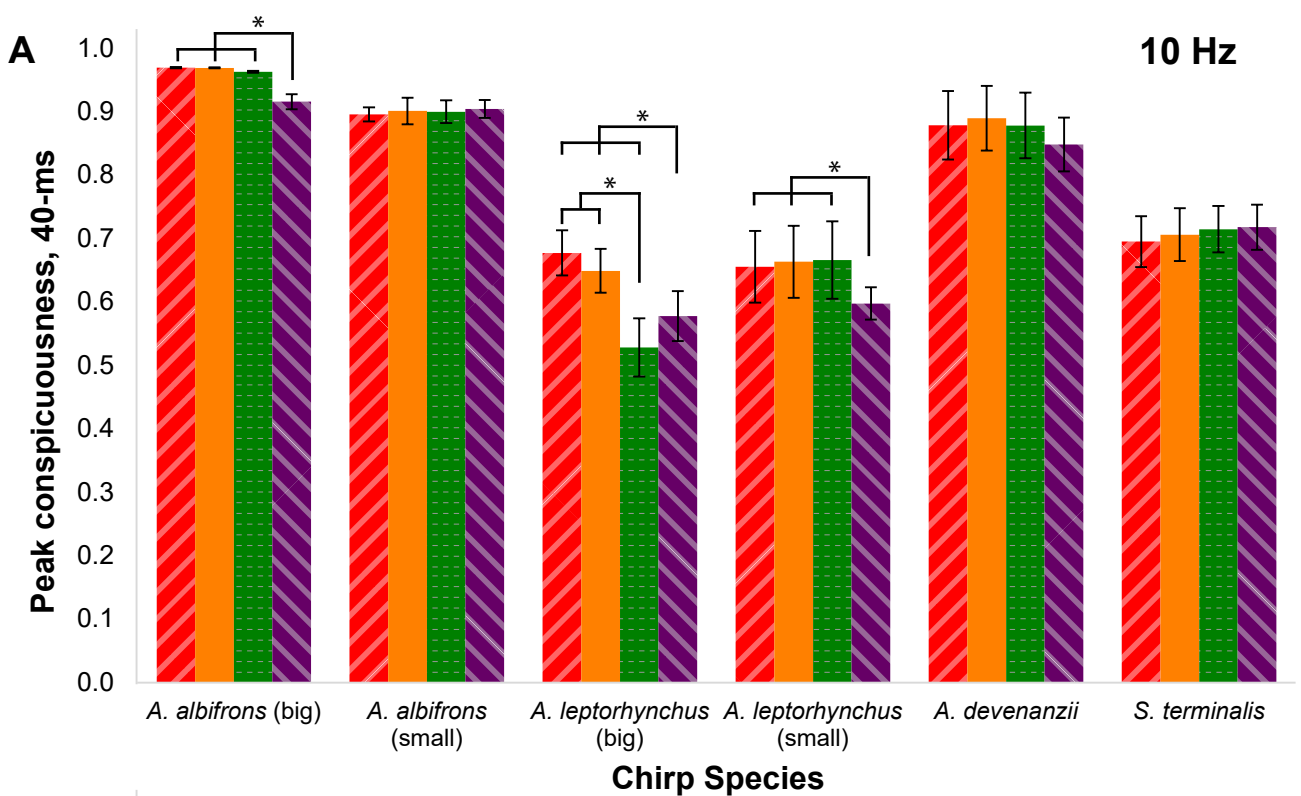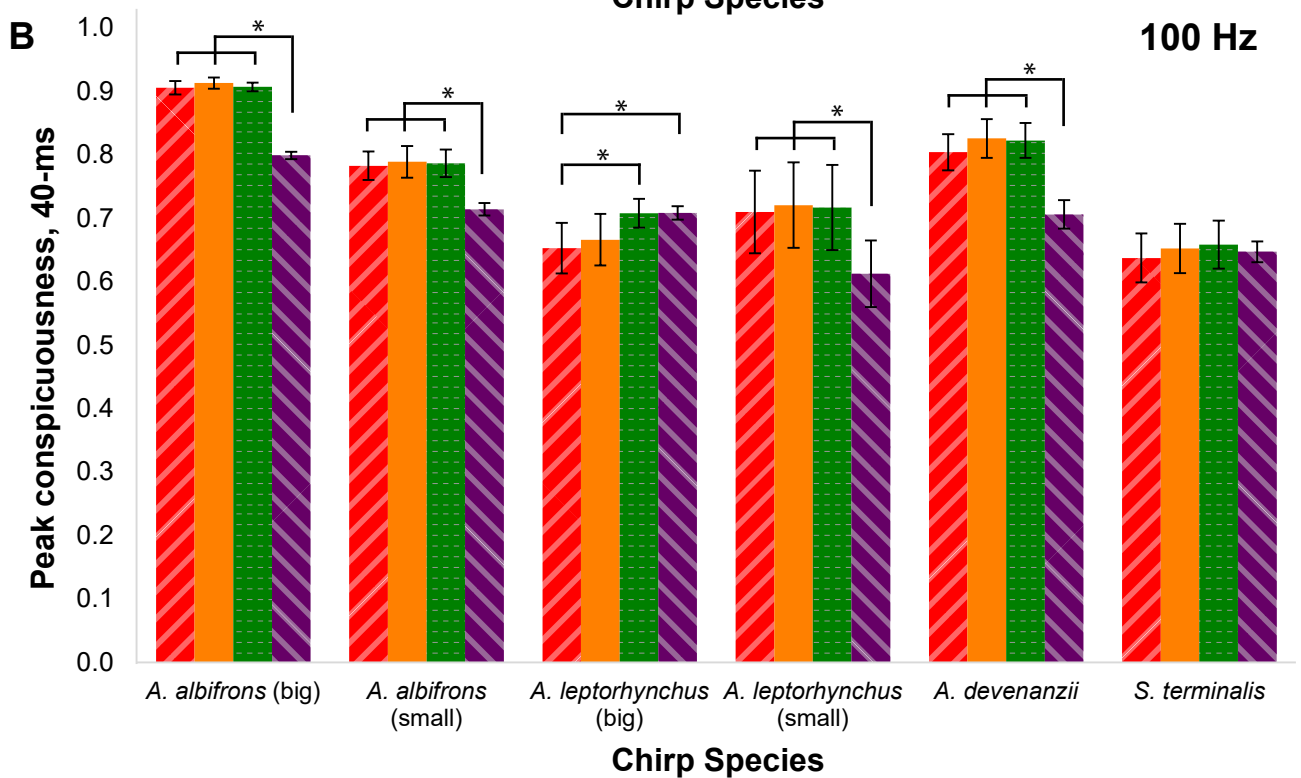

**EOD Species** *A. albifrons* *A. leptorhynchus* *A. devenanzii* *S. terminalis*

**Supplemental Fig 8.** Peak conspicuosity of hybrid chirps on a A) 10 Hz beat and B) 100 Hz beat (40-ms window). Chirps from four species (including two different types of *A. leptorhynchus* and *A. albifrons* chirps, n=6 from each species/chirp type) were re-synthesized on the waveform of four species, including the waveform of the species from which the chirp came. The bars are arranged from most sinusoidal (*A. albifrons*) to most complex (*S. terminalis*) EOD waveform. The chirps were combined with an EOD from the waveform donor species to measure peak conspicuosity. Asterisks indicate statistically significant differences ( $p < 0.05$ , Fisher PLSD) between the conspicuosity of chirps on different species-specific EOD waveforms. Error bars show one standard error from the mean.



Supplemental Table 1. Partial correlations for natural chirp conspicuousness analysis (10-ms and 40-ms peak).

| Signal parameter     | Peak (10-ms window) <sup>1</sup> |                   | Peak (40-ms window) <sup>2</sup> |                   |
|----------------------|----------------------------------|-------------------|----------------------------------|-------------------|
|                      | Partial correlation              | p                 | Partial correlation              | p                 |
| Chirp duration       | 0.04                             | 0.53              | <b>0.09</b> <sup>3</sup>         | <b>0.11</b>       |
| Chirp FM             | <b>0.74</b>                      | <b>&lt;0.0001</b> | <b>0.44</b>                      | <b>&lt;0.0001</b> |
| Chirp relative decay | <b>0.19</b>                      | <b>&lt;0.001</b>  | <b>0.19</b>                      | <b>0.001</b>      |
| DF                   | <b>-0.60</b>                     | <b>&lt;0.001</b>  | <b>-0.08</b>                     | <b>0.15</b>       |
| F2-F1                | 0.006                            | 0.92              | -0.04                            | 0.54              |
| F3-F1                | <b>0.08</b>                      | <b>0.17</b>       | <b>-0.16</b>                     | <b>0.006</b>      |

<sup>1</sup> F(4, 289)=136.6, p<0.0001, R<sup>2</sup> adj=0.65 for the multiple regression model

<sup>2</sup> F(5, 288)=24.2, p<0.0001, R<sup>2</sup> adj=0.28 for the multiple regression model

<sup>3</sup> Bold values indicate variables included in the respective multiple regression model.

Supplemental Table 2. Partial correlations stepwise regression using standard deviation of natural chirp peak values (20-ms window).

|                         | <u>SD of Peak (20-ms window)<sup>1</sup></u> |                  |
|-------------------------|----------------------------------------------|------------------|
| <u>Signal parameter</u> | <u>Partial correlation</u>                   | <u>p</u>         |
| Chirp duration          | -0.02                                        | 0.75             |
| Chirp FM                | <b>0.39<sup>2</sup></b>                      | <b>&lt;0.001</b> |
| Chirp relative decay    | <b>0.08</b>                                  | <b>0.18</b>      |
| DF                      | <b>-0.43</b>                                 | <b>&lt;0.001</b> |
| F2-F1                   | <b>0.08</b>                                  | <b>0.18</b>      |
| F3-F1                   | -0.05                                        | 0.39             |

<sup>1</sup> F(4, 289)=136.6, p<0.0001, R<sup>2</sup> adj=0.65 for the multiple regression model

<sup>2</sup> Bold values indicate variables included in the multiple regression model.

Supplemental Table 3. Synthetic chirps peak conspicuousness ANOVA table (10-ms window)

|                              | d.f. | F      | p       |
|------------------------------|------|--------|---------|
| Chirp Species                | 5    | 25.80  | <0.0001 |
| DF                           | 1    | 496.96 | <0.0001 |
| DF*Chirp Species             | 5    | 27.02  | <0.0001 |
| EOD Species                  | 3    | 3.29   | 0.024   |
| EOD Species*Chirp Species    | 15   | 16.47  | <0.0001 |
| DF*EOD Species               | 3    | 5.44   | 0.0018  |
| DF*EOD Species*Chirp Species | 15   | 8.46   | <0.0001 |

Supplemental Table 4. Synthetic chirps peak conspicuousness ANOVA table (40-ms window)

|                              | d.f. | F     | p       |
|------------------------------|------|-------|---------|
| Chirp Species                | 5    | 16.86 | <0.0001 |
| DF                           | 1    | 15.38 | 0.0005  |
| DF*Chirp Species             | 5    | 11.48 | <0.0001 |
| EOD Species                  | 3    | 6.68  | 0.0004  |
| EOD Species*Chirp Species    | 15   | 1.07  | 0.40    |
| DF*EOD Species               | 3    | 6.82  | 0.0003  |
| DF*EOD Species*Chirp Species | 15   | 4.56  | <0.0001 |
